# Supplementary material for: PRMT5 disruption drives antitumor immunity in cervical cancer by reprogramming T cell-mediated response and regulating PD-L1 expression
Source: Theranostics. 2021 Aug 28;11(18):9162–76. doi: 10.7150/thno.59605 (PMC8419032; doi:10.7150/thno.59605)
Supplement: Supplementary file 1 — Supplementary figures and tables. [file thnov11p9162s1.pdf]

# Supplementary Materials for

PRMT5 disruption drives antitumor immunity in cervical cancer by  
reprogramming T cell-mediated response and regulating PD-L1  
expression

Yongshuai Jiang<sup>1#</sup>, Yuanyang Yuan<sup>1#\*</sup>, Ming Chen<sup>2</sup>, Shengzhe Li<sup>1</sup>, Jun Bai<sup>1</sup>,  
Yuanteng Zhang<sup>1</sup>, Ying Sun<sup>1</sup>, Guojue Wang<sup>1</sup>, Haiyan Xu<sup>1</sup>, Ziyu Wang<sup>1</sup>, Yingxia  
Zheng<sup>3\*</sup>, Hong Nie<sup>1\*</sup>

<sup>1</sup>Shanghai Institute of Immunology, Department of Immunology and Microbiology,  
Shanghai Jiao Tong University School of Medicine, Shanghai 200025, China.

<sup>2</sup>Department of Gynecology, Shanghai Ninth People's Hospital, Shanghai Jiao Tong  
University School of Medicine, Shanghai 200011, China.

<sup>3</sup>Department of Laboratory Medicine, Xin Hua Hospital, Shanghai Jiao Tong  
University School of Medicine, Shanghai 200092, China.

<sup>#</sup>These authors contribute equally to this article.

\* Correspondence should be addressed to Hong Nie (hnie0823@126.com), Yingxia  
Zheng (combi3230@163.com) and Yuanyang Yuan (sunralmega@126.com)

## **This file includes:**

Figures S1 to S6

Tables S1 to S4

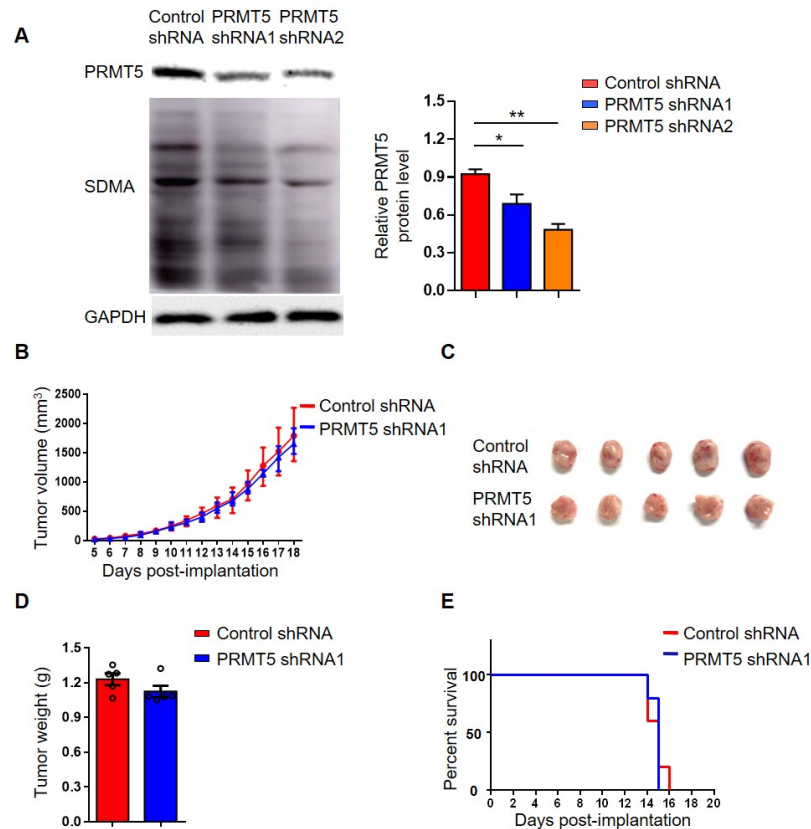

**Supplementary Figure 1. PRMT5 disruption had no effect on tumor growth in nude mice.** (A) PRMT5 expression and SDMA level in control cells and PRMT5 knockdown U14 cells (left panel), and the protein expression of PRMT5 was quantified by ImageJ (right panel). (B-E) Control cells and PRMT5 knockdown U14 cells were subcutaneously injected into 6-week-old female nude mice (n = 5 for each group). (B) A line graph shows the tumor growth curve of nude mice. Images (C) and weight (D) of the resected tumor at day 18 after inoculation. (E) Survival curve of tumor-bearing nude mice. Data are representative of at least two independent experiments. Values are presented as the mean  $\pm$  SEM. \*P < 0.05 and \*\*P < 0.01.

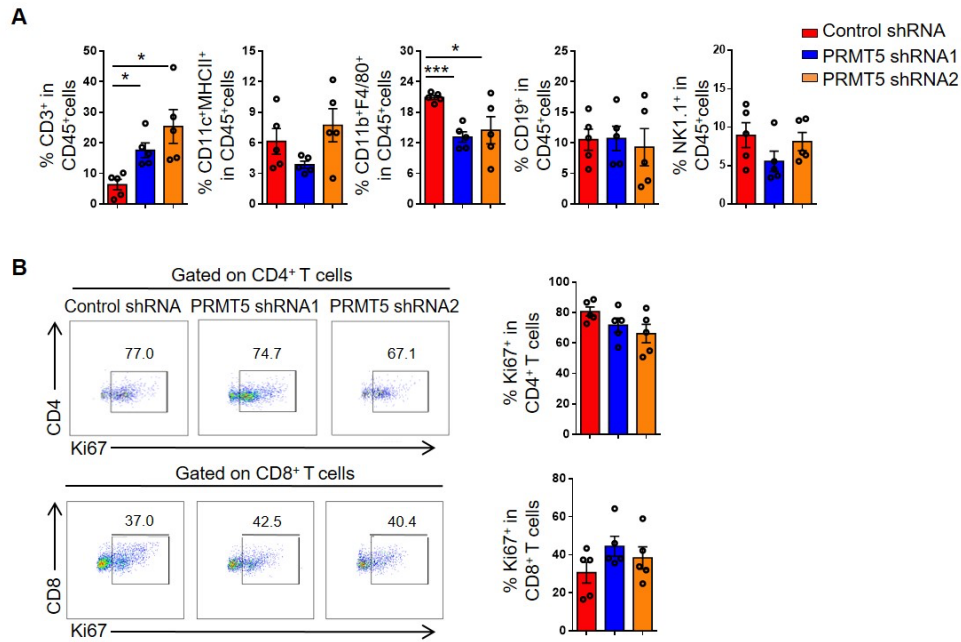

**Supplementary Figure 2. PRMT5 deficiency in tumor cells affected the profile of immune cells in the tumor microenvironment.** Control cells and PRMT5 knockdown U14 cells were subcutaneously injected into 6-week-old female C57BL/6 mice (n = 5 for each group). Mice were euthanized at day 8 after inoculation. The tumor single cell suspension was prepared and analyzed by flow cytometry. **(A)** Effect of PRMT5 knockdown U14 cells on the population of immune cells in the tumor microenvironment. **(B)** The expression of Ki67 in CD4<sup>+</sup> T and CD8<sup>+</sup> T cells. Data are representative of two independent experiments. Values are presented as the mean  $\pm$  SEM. \*P < 0.05 and \*\*\* P < 0.001.

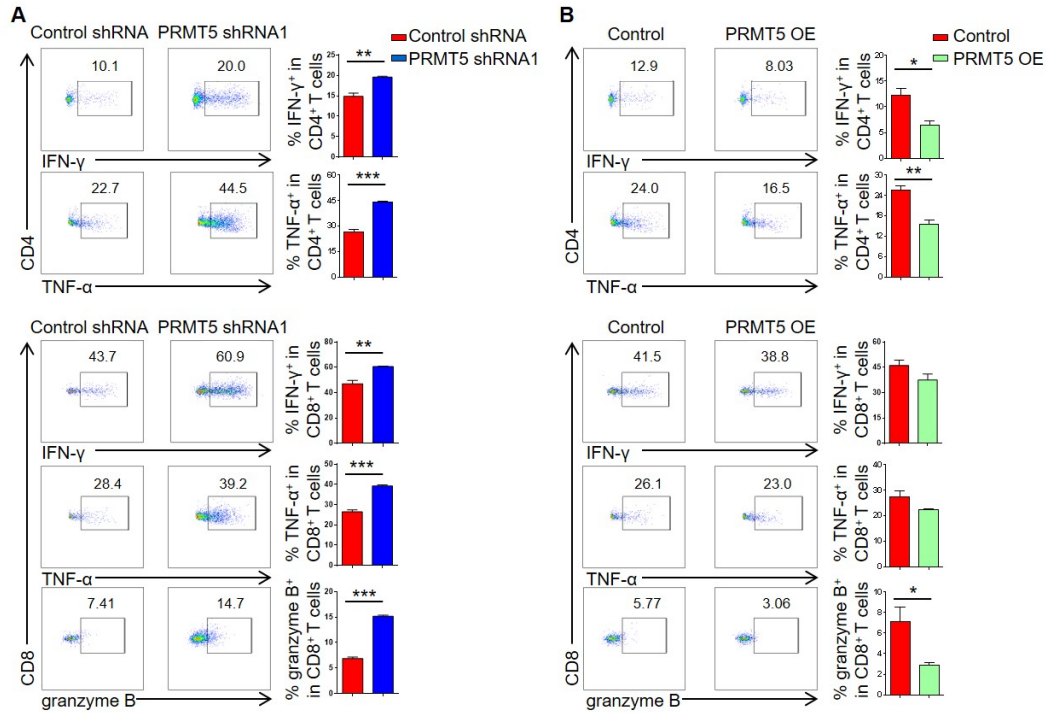

**Supplementary Figure 3. Abnormal expression of PRMT5 in cervical cancer cells affected intracellular cytokine expression of T cells in co-culture system.** PRMT5 knockdown U14 cells, PRMT5-overexpressing U14 cells or corresponding control group cells were co-cultured with T cells at ratio of 1:10, stimulated with anti-CD3 (2  $\mu$ g/mL) and anti-CD28 (2  $\mu$ g/mL) for 48 h. Flow cytometry was used to analyze the expression of IFN- $\gamma$ , TNF- $\alpha$  and granzyme B in T cells after co-cultured with PRMT5 knockdown U14 cells (A) and PRMT5-overexpressing U14 cells (B). Data are representative of two independent experiments. Values are presented as the mean  $\pm$  SEM. \* $P < 0.05$ , \*\* $P < 0.01$  and \*\*\* $P < 0.001$ .

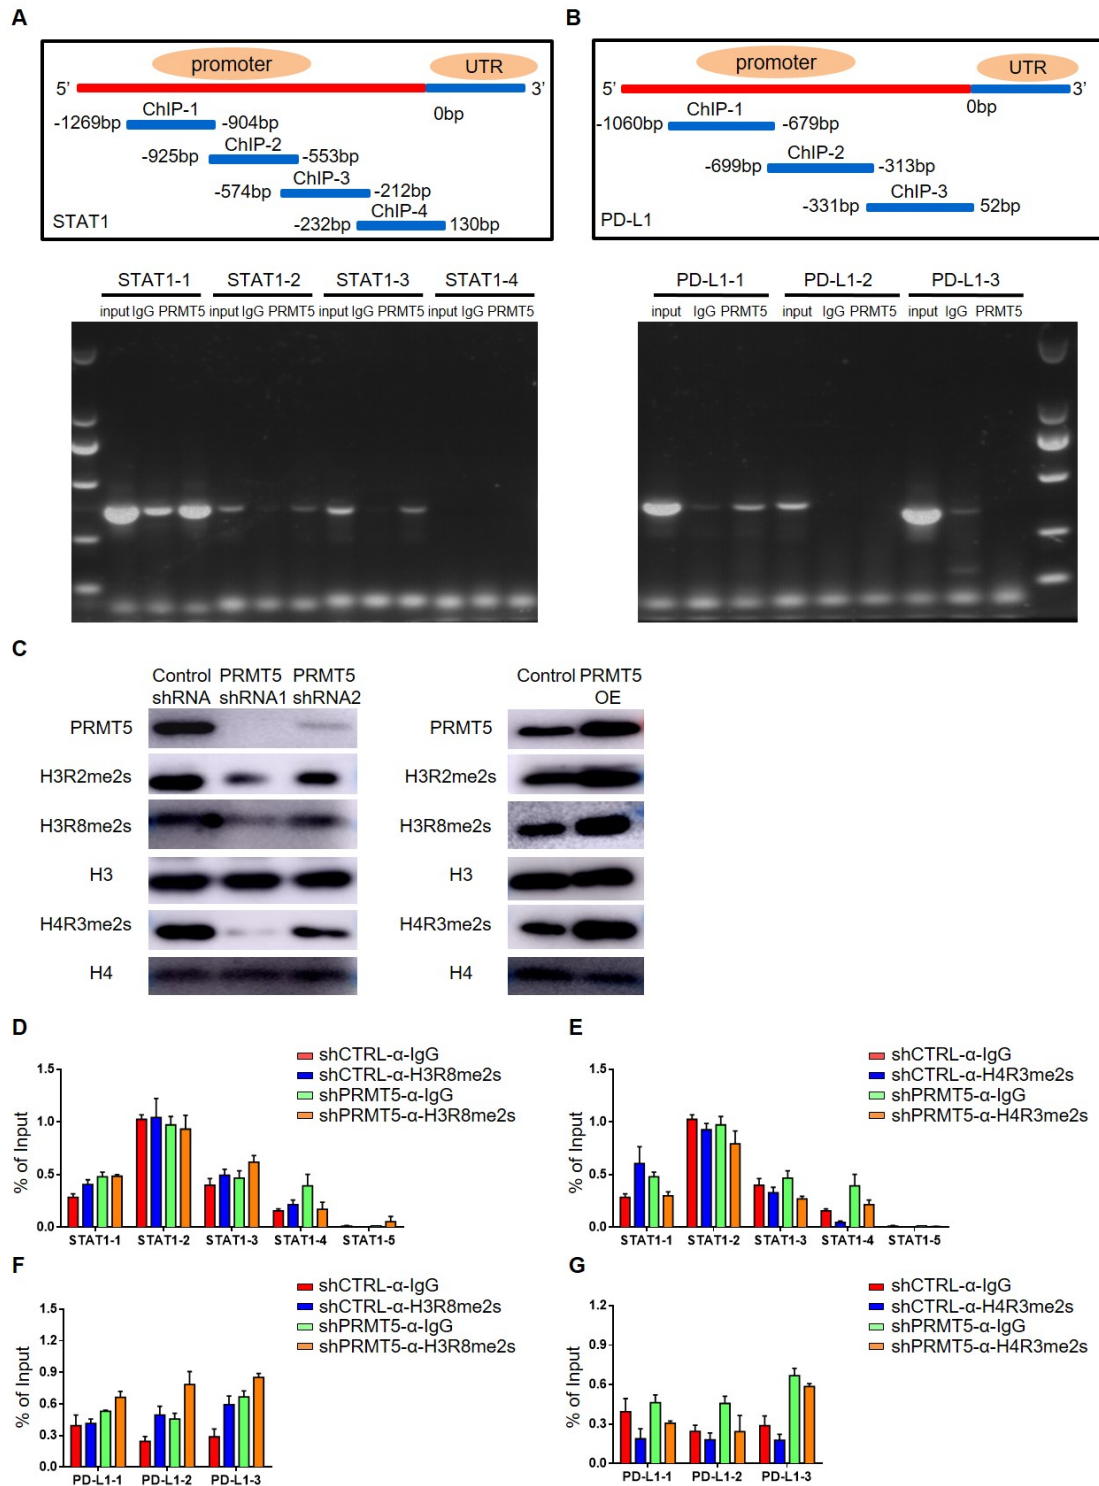

**Supplementary Figure 4. PRMT5 regulated STAT1 and PD-L1 transcription and increased H3R2, H3R8 and H4R3 dimethylation level. (A-B)** Enrichment of PRMT5 or IgG at the STAT1 promoter (**A**) or at the PD-L1 promoter (**B**) was assessed by ChIP PCR. (**C**) The expression of PRMT5, H3R2me2s, H3R8me2s and H4R3me2s in Siha

cells was determined by western blot, and H3 or H4 was served as a loading control.

**(D-E)** Enrichment of H3R8me2s, H4R3me2s or IgG at the STAT1 promoter was assessed by ChIP Q-PCR. **(F-G)** Enrichment of H3R8me2s, H4R3me2s or IgG at the PD-L1 promoter was assessed by ChIP Q-PCR. Data are representative of two independent experiments. Values are presented as the mean  $\pm$  SEM.

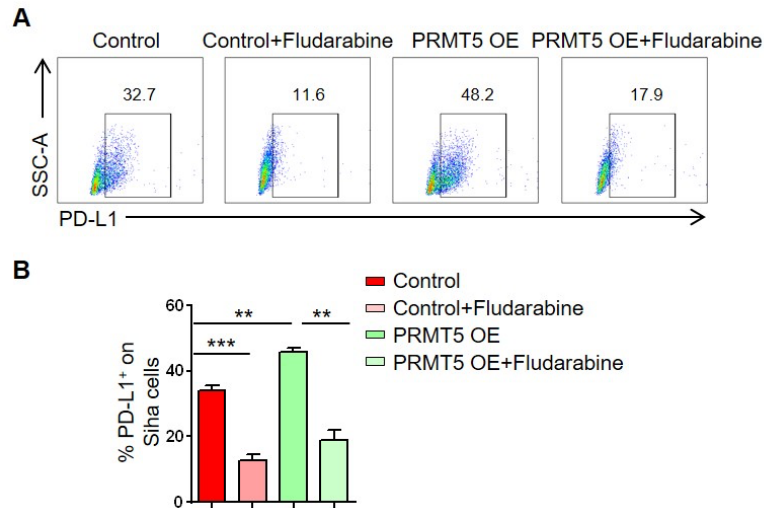

**Supplementary Figure 5. A STAT1 inhibitor reduced PD-L1 expression in cervical cancer cells.** Control cells and PRMT5-overexpressing Siha cells were simultaneously stimulated with IFN- $\gamma$  (40 ng/mL) and treated with or without a STAT1 inhibitor (Fludarabine, 5  $\mu$ M) for 24 h. Flow-cytometric analysis of PD-L1 expression on Siha cells (**A**), and statistical analysis of the percentage of PD-L1 expression (**B**). Data are representative of two independent experiments. Values are presented as the mean  $\pm$  SEM. \*\*P < 0.01 and \*\*\* P < 0.001.

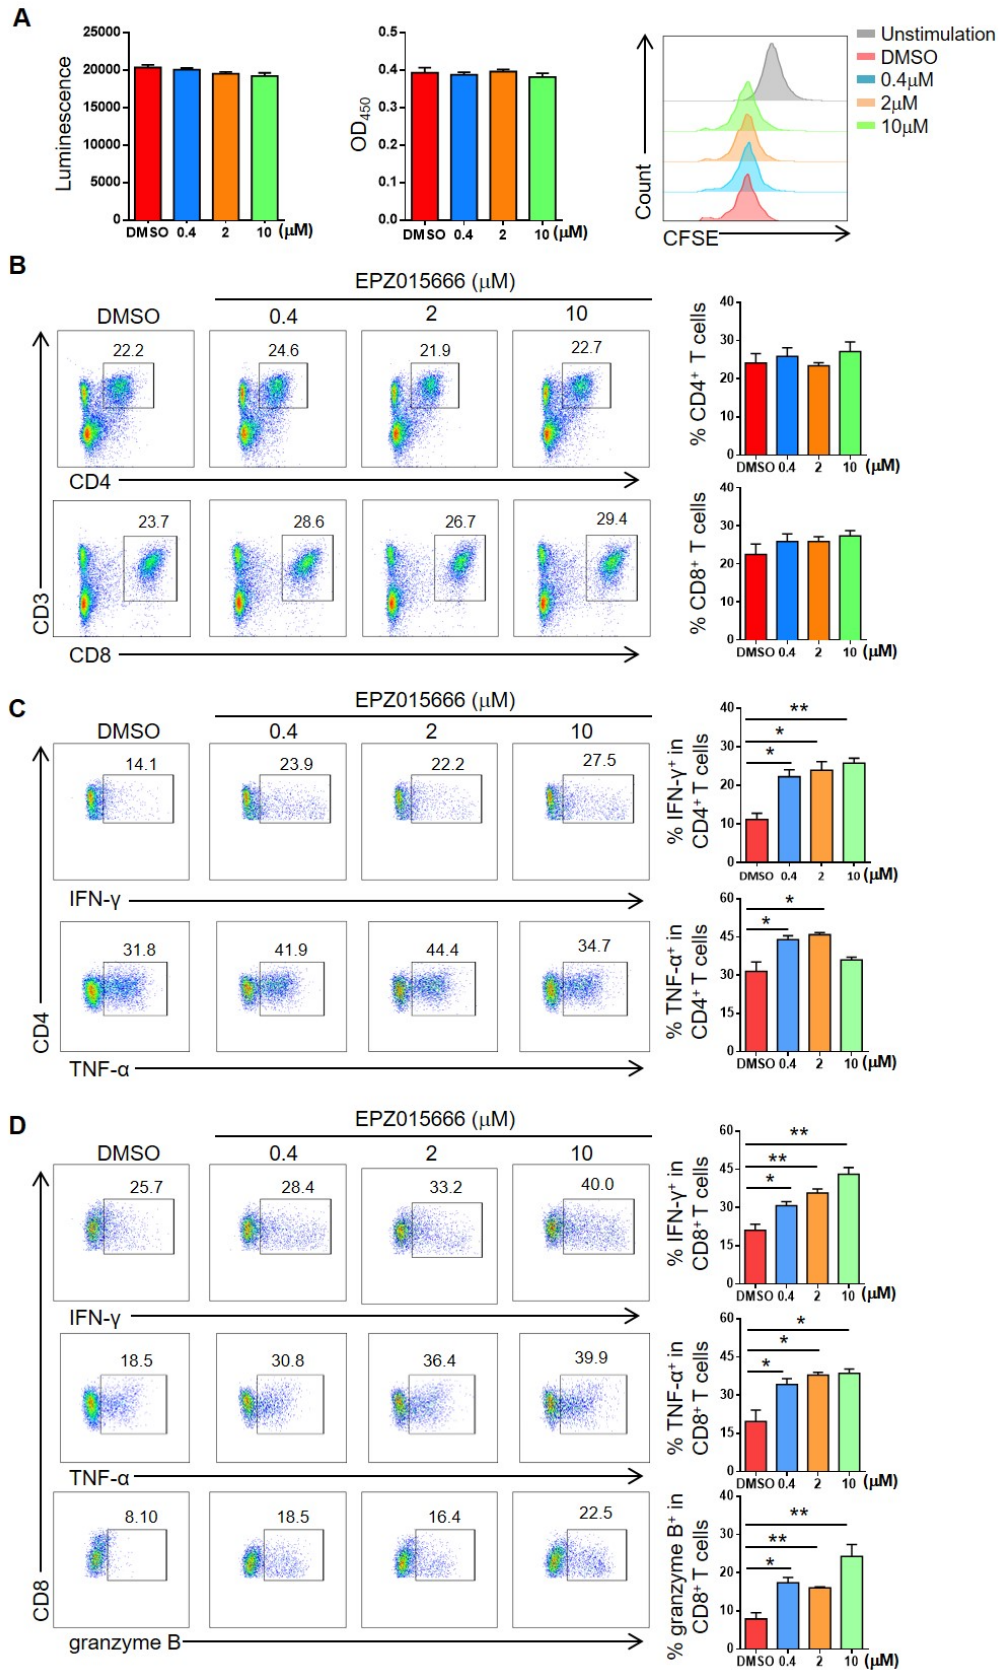

**Supplementary Figure 6. EPZ015666 promoted the expression of intracellular cytokines in T cells.** C57BL/6 mouse splenocytes were added to the cell culture plate

coated with anti-CD3 (1  $\mu\text{g/mL}$ ), and simultaneously cultured with anti-CD28 (1  $\mu\text{g/mL}$ ) and the indicated concentrations of EPZ015666 for 72 h (n = 3). **(A)** Effect of EPZ015666 on the viability (left panel) and proliferation (middle and right panel) of mouse splenocytes was analyzed by CellTiter-Glo luminescent assay, CCK-8 Cell Counting assay and CFSE staining, respectively. The percentage of CD4<sup>+</sup> T and CD8<sup>+</sup> T cells in spleen cells **(B)**, the expression of cytokines in CD4<sup>+</sup> T cells **(C)** and CD8<sup>+</sup> T cells **(D)** were analyzed by flow cytometry. Values are presented as the mean  $\pm$  SEM. \*P < 0.05 and \*\*P < 0.01.

**Supplementary Table 1. Antibodies used in the experiment.**

| Antibodies                                    | Source      | Identifier |
|-----------------------------------------------|-------------|------------|
| Monoclonal Antibody CD45 PerCP-Cyanine5.5     | eBioscience | 45-0451-82 |
| Rat Anti-Mouse CD45 BV421                     | BD          | 563890     |
| Monoclonal Antibody CD3 Alexa Fluor 700       | eBioscience | 56-0032-82 |
| Monoclonal Antibody CD4 FITC                  | eBioscience | 11-0041-85 |
| Rat Anti-Mouse CD8a PE-CF594                  | BD          | 562283     |
| Hamster Anti-Mouse CD279 (PD-1) BV421         | BD          | 562584     |
| Monoclonal Antibody CD274 (PD-L1) PE          | eBioscience | 12-5982-82 |
| Anti-mouse Antibody CD366 (TIM-3) BV605       | Biolegend   | 119721     |
| Rat Anti-Mouse CD223 (LAG-3) BV711            | BD          | 563179     |
| Monoclonal Antibody IFN- $\gamma$ PE-Cyanine7 | eBioscience | 25-7311-82 |
| Monoclonal Antibody TNF- $\alpha$ APC         | eBioscience | 17-7321-81 |
| Monoclonal Antibody Foxp3 APC                 | eBioscience | 17-5773-82 |
| Monoclonal Antibody granzyme B PE             | eBioscience | 12-8898-80 |
| Monoclonal Antibody Ki67 FITC                 | eBioscience | 11-5698-82 |
| Fixable Viability Dye eFluor 780              | eBioscience | 65-0865-18 |
| LIVE/DEAD™ Fixable Blue Dead Cell Stain Kit   | Life        | L34962     |

**Supplementary Table 2. Primer sequences for quantitative real-time PCR.**

|                  |         |                                 |
|------------------|---------|---------------------------------|
| hGAPDH           | Forward | 5'- GGTGGTCTCCTCTGACTTCAACA -3' |
|                  | Reverse | 5'- GTTGCTGTAGCCAAATTCGTTGT -3' |
| hPRMT5           | Forward | 5'- CTGTCTTCCATCCGCGTTTCA -3'   |
|                  | Reverse | 5'- GCAGTAGGTCTGATCGTGTCTG -3'  |
| m $\beta$ -actin | Forward | 5'- TGTCCACCTTCCAGCAGATGT -3'   |
|                  | Reverse | 5'- AGCTCAGTAACAGTCCGCCTAG -3'  |
| mPRMT5           | Forward | 5'- CTGAATTGCGTCCCCGAAATA -3'   |
|                  | Reverse | 5'- AGGTTCTGAATGAACTCCCT -3'    |
| mJAK2            | Forward | 5'- TTGTGGTATTACGCCTGTGTATC -3' |
|                  | Reverse | 5'- ATGCCTGGTTGACTCGTCTAT -3'   |
| mSTAT1           | Forward | 5'- CGGAGTCGGAGGCCCTAAT -3'     |
|                  | Reverse | 5'- ACAGCAGGTGCTTCTTAATGAG -3'  |
| mPD-L1           | Forward | 5'- GCTCCAAAGGACTTGTACGTG -3'   |
|                  | Reverse | 5'- TGATCTGAAGGGCAGCATTTC -3'   |

**Supplementary Table 3. Primer sequences for ChIP PCR.**

|                   |         |                               |
|-------------------|---------|-------------------------------|
| STAT1 first site  | Forward | 5'- AGCCAGCGAAGAGTTGGGTGA -3' |
|                   | Reverse | 5'- GCCTCCTTCTGCAGTAGATTC -3' |
| STAT1 second site | Forward | 5'- GAATCTACTGCAGAAGGAGGC -3' |
|                   | Reverse | 5'- CTTCTCCTAAACGCTGTGCTG -3' |
| STAT1 third site  | Forward | 5'- CAGCACAGCGTTTAGGAGAAG -3' |
|                   | Reverse | 5'- CTTGGAGGTCTCTGTAGTAG -3'  |
| STAT1 forth site  | Forward | 5'- CTACTACAGAGACCTCCAAG -3'  |
|                   | Reverse | 5'- CTCCGCAGACTCTGCGCAGGA -3' |
| PD-L1 first site  | Forward | 5'- AACCAATGCAAGGGCTATCTC -3' |
|                   | Reverse | 5'- GGTCCCTGATATTCTGCCACC -3' |
| PD-L1 second site | Forward | 5'- GGTGGCAGAATATCAGGGACC -3' |
|                   | Reverse | 5'- CAACAAGCCAACATCTGAACG -3' |
| PD-L1 third site  | Forward | 5'- CGTTCAGATGTTGGCTTGTTG -3' |
|                   | Reverse | 5'- CTCGGGAAGCTGCGCAGAAC -3'  |

**Supplementary Table 4. Primer sequences for ChIP Q-PCR.**

|                   |         |                                 |
|-------------------|---------|---------------------------------|
| STAT1 first site  | Forward | 5'- CCAGCGAAGAGTTGGGTGAA -3'    |
|                   | Reverse | 5'- TATAAAGCCCTGGTTGCCCCG -3'   |
| STAT1 second site | Forward | 5'- TTGGACAAAGAGATCGGGCAA -3'   |
|                   | Reverse | 5'- TGCCTCACTTCAGCCCTTAT -3'    |
| STAT1 third site  | Forward | 5'- AAGTGAGGCAGCCATTCGGG -3'    |
|                   | Reverse | 5'- TGCAGTGAGCTCTACAAACT -3'    |
| STAT1 forth site  | Forward | 5'- CACTGCACATACAAGTGGAG -3'    |
|                   | Reverse | 5'- CCTGCCTCTGGCATTCTTTC -3'    |
| STAT1 fifth site  | Forward | 5'- AGGCAGGAAAAAGCAAGAAG -3'    |
|                   | Reverse | 5'- CTTGGAGGTCTCTGTAGTAG -3'    |
| PD-L1 first site  | Forward | 5'- AACCAATGCAAGGGCTATCTC -3'   |
|                   | Reverse | 5'- GTGCCTGTGTGCTCCCTTTTC -3'   |
| PD-L1 second site | Forward | 5'- AAGGGAGCACACAGGCACGG -3'    |
|                   | Reverse | 5'- GGGCCCAAGATGACAGACGATG -3'  |
| PD-L1 third site  | Forward | 5'- GTCTGTCATCTTGGGCCCATTTC -3' |
|                   | Reverse | 5'- CAGGGTCCCTGATATTCTGCC -3'   |
